# Supplementary material
Source: MDPI journal article supplement (https://www.mdpi.com/2077-1312/9/10/1128)
Supplement: s1 [file s1]

# Applying Artificial Intelligence Methods to Detect and Classify Fish Calls from The Northern Gulf of Mexico

Emily E. Waddell <sup>1,\*</sup>, Jeppe H. Rasmussen <sup>1,2</sup> and Ana Širović <sup>1,3</sup>

## Supplementary Materials

**Table S1.** Average confusion matrix of the three train/test dataset trials.

|        |             | Output |      |       |             |            |            |         |             |          |          |          | Sum    | Recall  |
|--------|-------------|--------|------|-------|-------------|------------|------------|---------|-------------|----------|----------|----------|--------|---------|
| Target |             | Beats  | Buzz | Croak | Click Train | Disk Write | Down-sweep | Jet ski | Pulse Train | LF Noise | No Noise | Ra Noise |        |         |
|        | Beats       | 529    | 0    | 0     | 0           | 6          | 0          | 0       | 1           | 9        | 68       | 12       | 626    | 85%     |
|        | Buzz        | 39     | 107  | 1     | 0           | 25         | 0          | 0       | 0           | 15       | 100      | 34       | 322    | 33%     |
|        | Croak       | 0      | 0    | 490   | 3           | 18         | 0          | 0       | 2           | 0        | 16       | 6        | 534    | 92%     |
|        | Click Train | 5      | 0    | 12    | 919         | 57         | 0          | 0       | 2           | 3        | 498      | 17       | 1512   | 61%     |
|        | Disk Write  | 39     | 15   | 211   | 103         | 28,096     | 22         | 1       | 10          | 776      | 2,280    | 303      | 31,857 | 88%     |
|        | Down-sweep  | 0      | 0    | 0     | 0           | 14         | 138        | 0       | 8           | 1        | 19       | 0        | 180    | 76%     |
|        | Jetski      | 0      | 0    | 3     | 0           | 31         | 19         | 337     | 0           | 0        | 104      | 2        | 497    | 68%     |
|        | Pulse Train | 0      | 0    | 4     | 0           | 44         | 18         | 0       | 221         | 1        | 40       | 3        | 332    | 66%     |
|        | Noise       | 288    | 23   | 182   | 387         | 4,855      | 131        | 5       | 98          | 1,994    | 41,633   | 5,930    | 55,527 | 89%     |
|        | Sum         | 902    | 146  | 903   | 1,412       | 33,146     | 328        | 343     | 341         | 2,801    | 44,759   | 6,308    | 91,387 |         |
|        | Precision   | 63%    | 73%  | 56%   | 65%         | 85%        | 43%        | 98%     | 66%         | 76%      | 93%      | 94%      |        | 87.97 % |

**Table S2.** Average confusion matrix of the three evaluation dataset trials.

|        |             | Output |      |       |             |            |            |         |             |          |          |          | Sum     | Recall |
|--------|-------------|--------|------|-------|-------------|------------|------------|---------|-------------|----------|----------|----------|---------|--------|
| Target |             | Beats  | Buzz | Croak | Click Train | Disk Write | Down-sweep | Jet ski | Pulse Train | LF Noise | No Noise | Ra Noise |         |        |
|        | Beats       | 422    | 1    | 0     | 0           | 6          | 0          | 0       | 2           | 23       | 31       | 3        | 488     | 86%    |
|        | Buzz        | 16     | 95   | 0     | 0           | 0          | 0          | 0       | 0           | 20       | 24       | 58       | 213     | 44%    |
|        | Croak       | 1      | 0    | 261   | 0           | 4          | 0          | 0       | 0           | 8        | 10       | 6        | 290     | 90%    |
|        | Click Train | 4      | 0    | 3     | 39          | 4          | 0          | 0       | 7           | 2        | 15       | 3        | 77      | 51%    |
|        | Disk Write  | 3      | 8    | 84    | 0           | 4,521      | 43         | 4       | 3           | 421      | 1,255    | 178      | 6,521   | 69%    |
|        | Down-sweep  | 0      | 0    | 0     | 0           | 2          | 87         | 0       | 2           | 2        | 3        | 1        | 96      | 91%    |
|        | Jetski      | 0      | 0    | 5     | 0           | 4          | 60         | 525     | 2           | 14       | 215      | 22       | 847     | 62%    |
|        | Pulse Train | 2      | 0    | 12    | 0           | 5          | 62         | 0       | 230         | 24       | 53       | 13       | 400     | 58%    |
|        | Noise       | 426    | 398  | 1,410 | 49          | 2,898      | 817        | 59      | 196         | 19,660   | 72,206   | 21,888   | 120,006 | 95%    |
|        | Sum         | 873    | 502  | 1,775 | 88          | 7,444      | 1,069      | 589     | 441         | 20,173   | 73,812   | 22,173   | 128,938 |        |
|        | Precision   | 50%    | 27%  | 18%   | 44%         | 62%        | 10%        | 90%     | 53%         | 97%      | 98%      | 99%      |         | 93.02% |

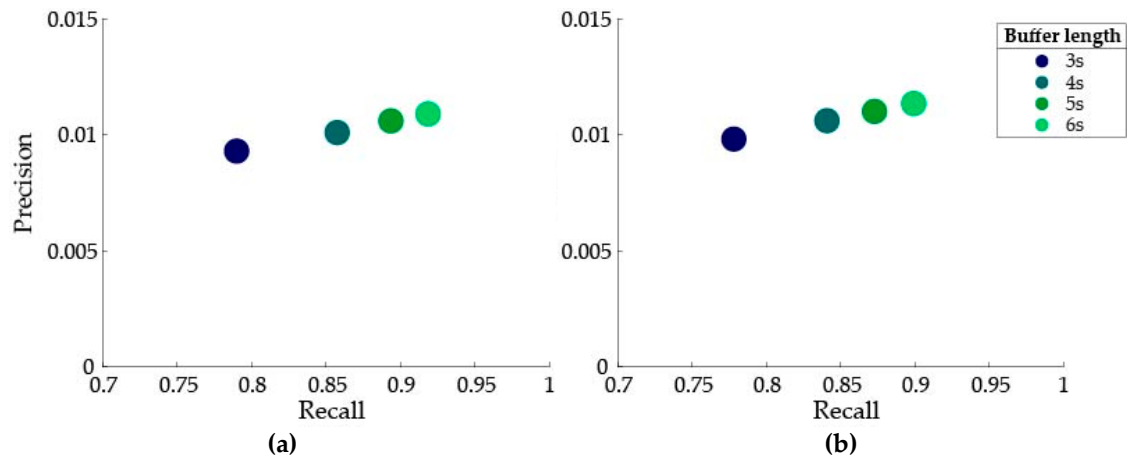

**Figure S1.** Energy detector precision and recall dependent on various buffer lengths (3 s, 4 s, 5 s, and 6 s) for: (a) the train/test dataset and (b) the evaluation dataset.

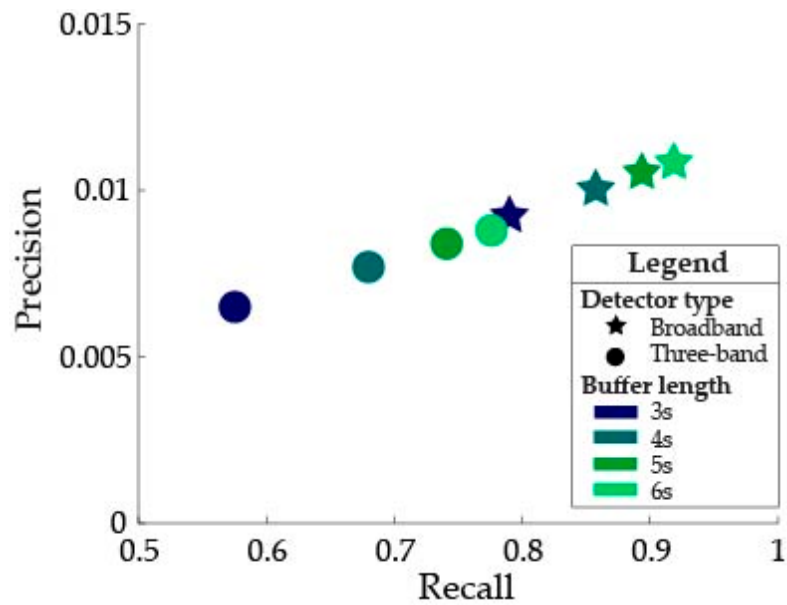

**Figure S2.** Comparison of precision and recall between the three-band detector (circles) and single, broadband (stars) energy detector based on various buffer lengths of 3 s, 4 s, 5 s, and 6 s.

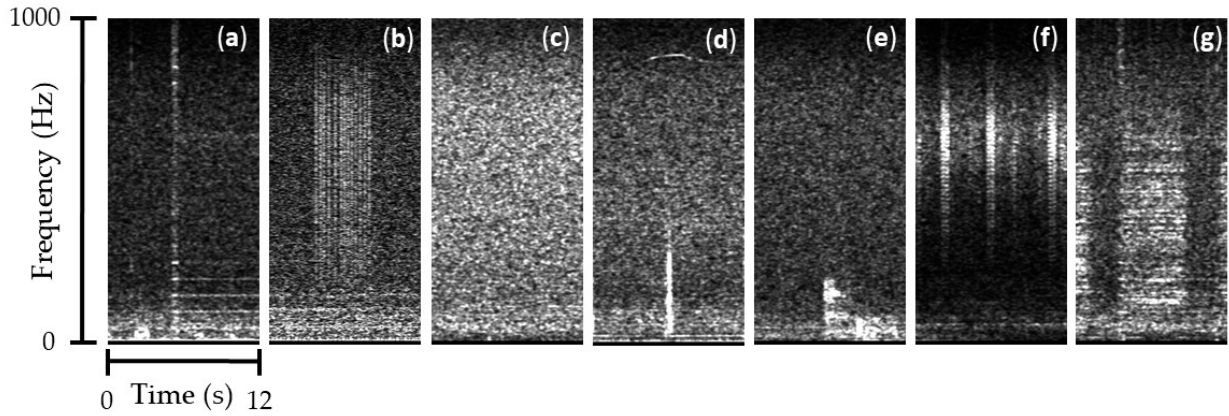

**Figure S3.** Images (created from spectrograms) of the five noise types that the classifier was trained with: (a) Disk write, (b) Click train, (c) Blank/ noise, (d) Low frequency noise, (e) Low frequency noise, (f) Random noise, and (g) Random noise.

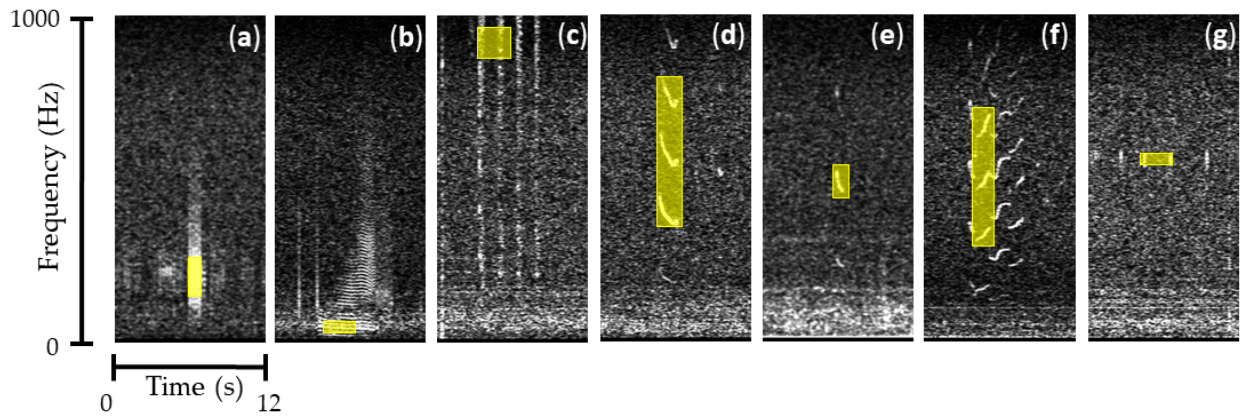

**Figure S4.** Images (created from spectrograms) of the six fish call types: (a) Beats, (b) Buzz, (c) Croak, (d) DownswEEP full sweep, (e) DownswEEP strongest sweep, (f) Jetski, and (g) Pulse train, with shaded bands (yellow) representing the frequency band and duration over which the signal sound pressure level was calculated for each call type. Two SNR calculations were made for each DownswEEP call (indicated by d and e) because a high intensity DownswEEP call had multiple downsweeps, but a less intense DownswEEP call, which was more commonly observed in the data, had only one or two downsweeps.

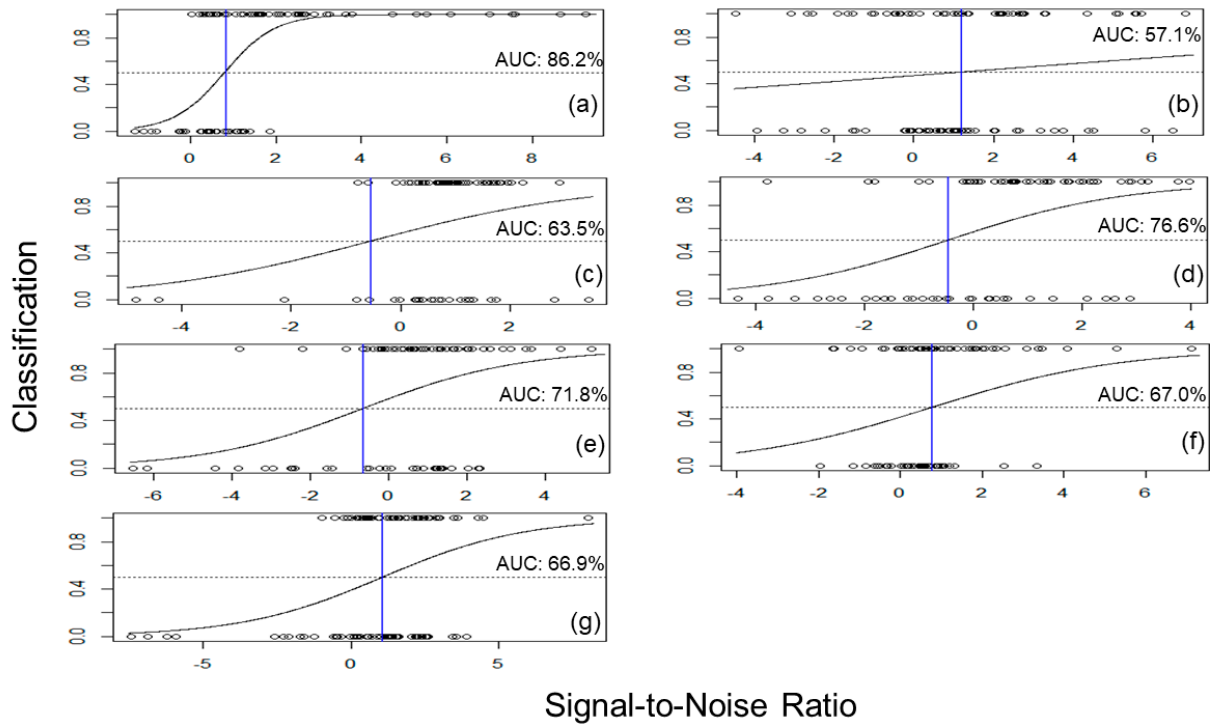

**Figure S5.** Binomial logistic regression plots with a 0.5 threshold (black, dotted horizontal line; 0 = incorrectly classified, 1 = correctly classified) to determine the signal-to-noise ratio (SNR) threshold value (vertical blue line in each subplot), the SNR value above which a call should be correctly classified, for each fish call type: (a) Beats, (b) Buzz, (c) Croak, (d) Downsweep full sweep, (e) Downsweep strongest sweep, (f) Jetski, and (g) Pulse train. Area under the receiver operating characteristic curve (AUC) calculation included in each subplot for each fish call type.

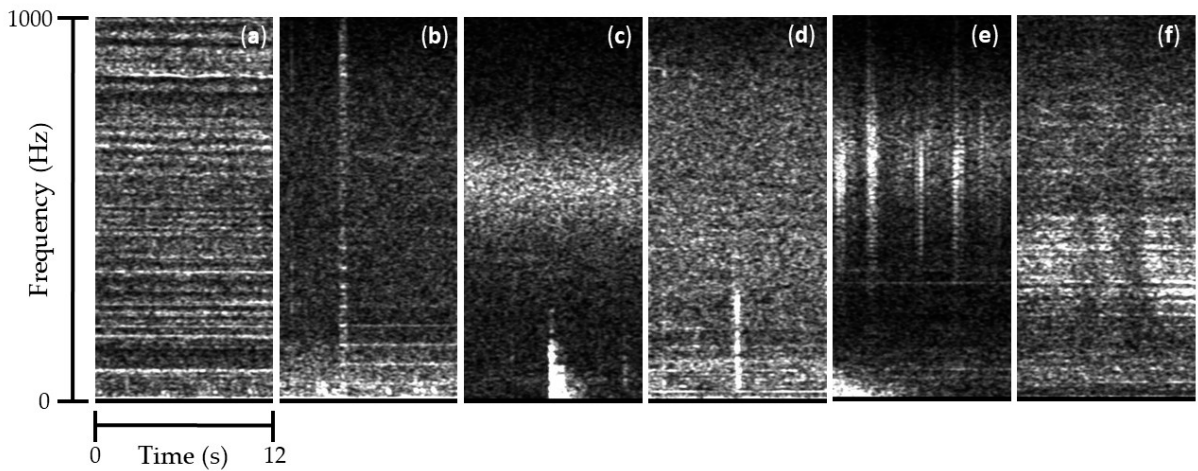

**Figure S6.** Images (created from spectrograms) of commonly detected noises in the three datasets: (a) ship noise, (b) disk write, (c) airguns, (d) airguns, (e) unidentified noise, and (f) unidentified noise.

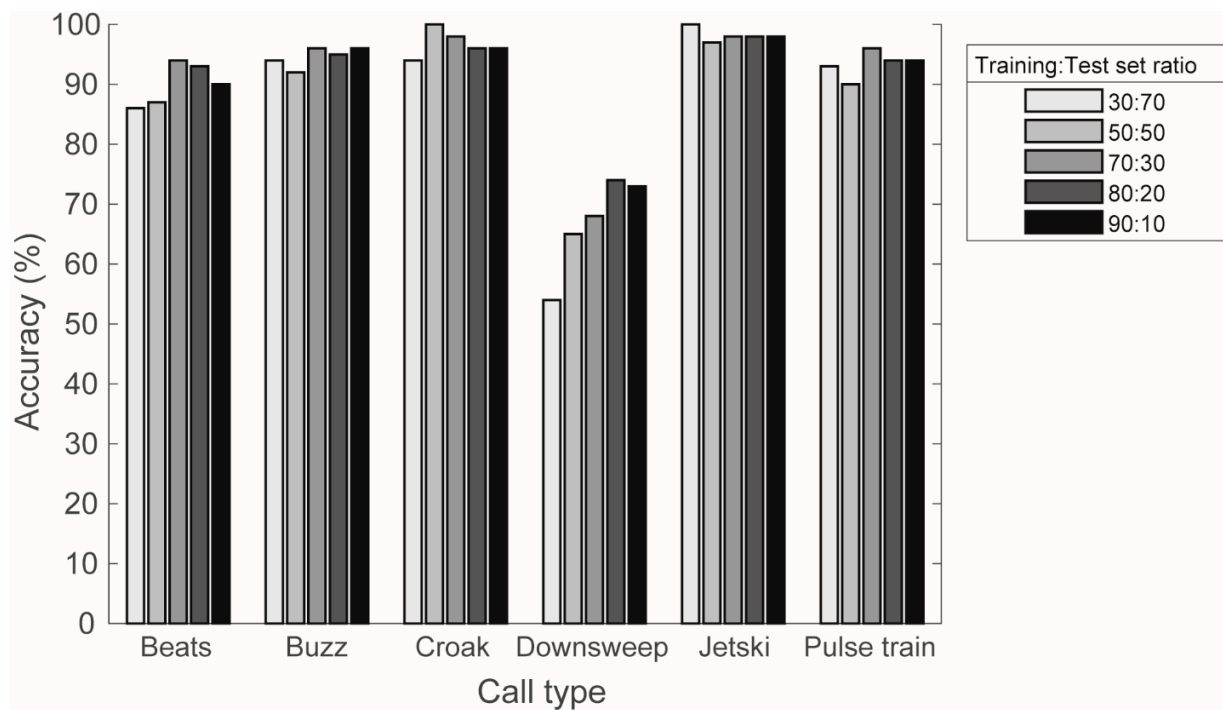

**Figure S7.** ResNet-50 classification accuracy for each of the six fish call types depending on the training:test set ratio (30:70, 50:50, 70:30, 80:20, 90:10).
